# Supplementary material for: Hierarchical mesoporous selenium@bimetallic selenide quadrilateral nanosheet arrays for advanced flexible asymmetric supercapacitors
Source: Royal Society of Chemistry journal article supplement (doi:10.1039/d2ta03074h), 2022-01-01
Supplement: d2ta03074h1.pdf [file d2ta03074h1.pdf]

## Supporting information

# Hierarchical Mesoporous Selenium@Bimetallic Selenides Quadrilateral Nanosheets Array for Advanced Flexible Asymmetric Supercapacitor

*Yan Zhao*<sup>a, c</sup>, *Sichao Wang*<sup>c</sup>, *Fei Ye*<sup>b</sup>, *Wenjie Liu*<sup>c</sup>, *Jiabiao Lian*<sup>c</sup>, *Guochun Li*<sup>c</sup>, *Huanting Wang*<sup>d</sup>, *Linfeng Hu*<sup>\*b</sup>, *Limin Wu*<sup>\*a, e</sup>

<sup>a</sup> College of Chemistry and Chemical Engineering, Inner Mongolia University, Hohhot, 010021 China

<sup>b</sup> School of Materials Science and Engineering, Southeast University Nanjing, 211189 China

<sup>c</sup> Institute for Energy Research, Jiangsu University, Zhenjiang, 212013 China

<sup>d</sup> Department of Chemical Engineering, Monash University, Victoria, 3800, Australia

<sup>e</sup> Department of Materials Science, Fudan University, Shanghai, 200433, China

---

\* Corresponding authors: [lmw@fudan.edu.cn](mailto:lmw@fudan.edu.cn); [linfenghu@seu.edu.cn](mailto:linfenghu@seu.edu.cn)

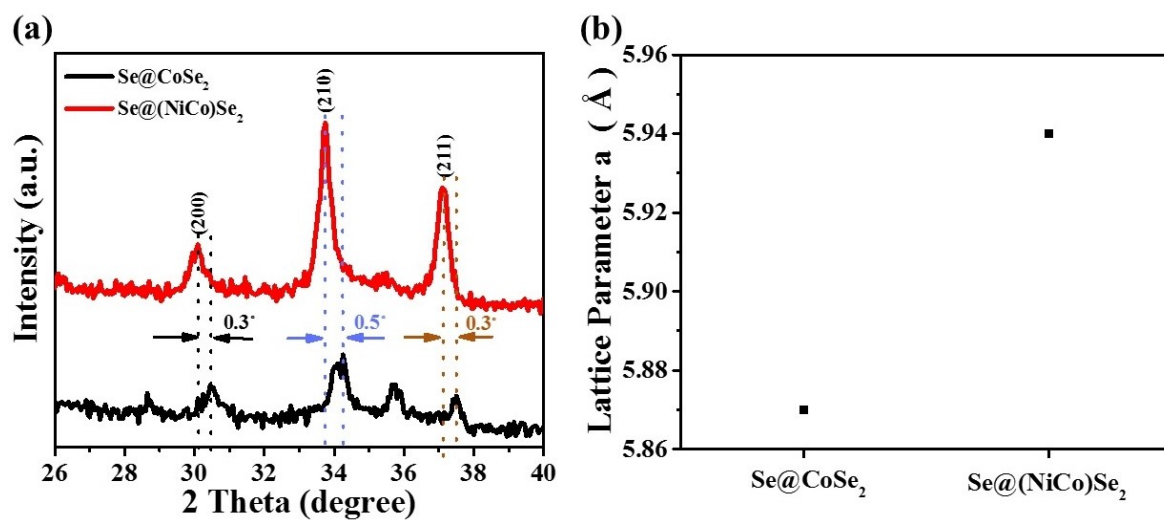

**Figure S1.** (a) The XRD patterns of Se@CoSe<sub>2</sub> and Se@(NiCo)Se<sub>2</sub> range from 26° to 40°. (b)

The lattice parameter of Se@CoSe<sub>2</sub>@Se and Se@(NiCo)Se<sub>2</sub>.

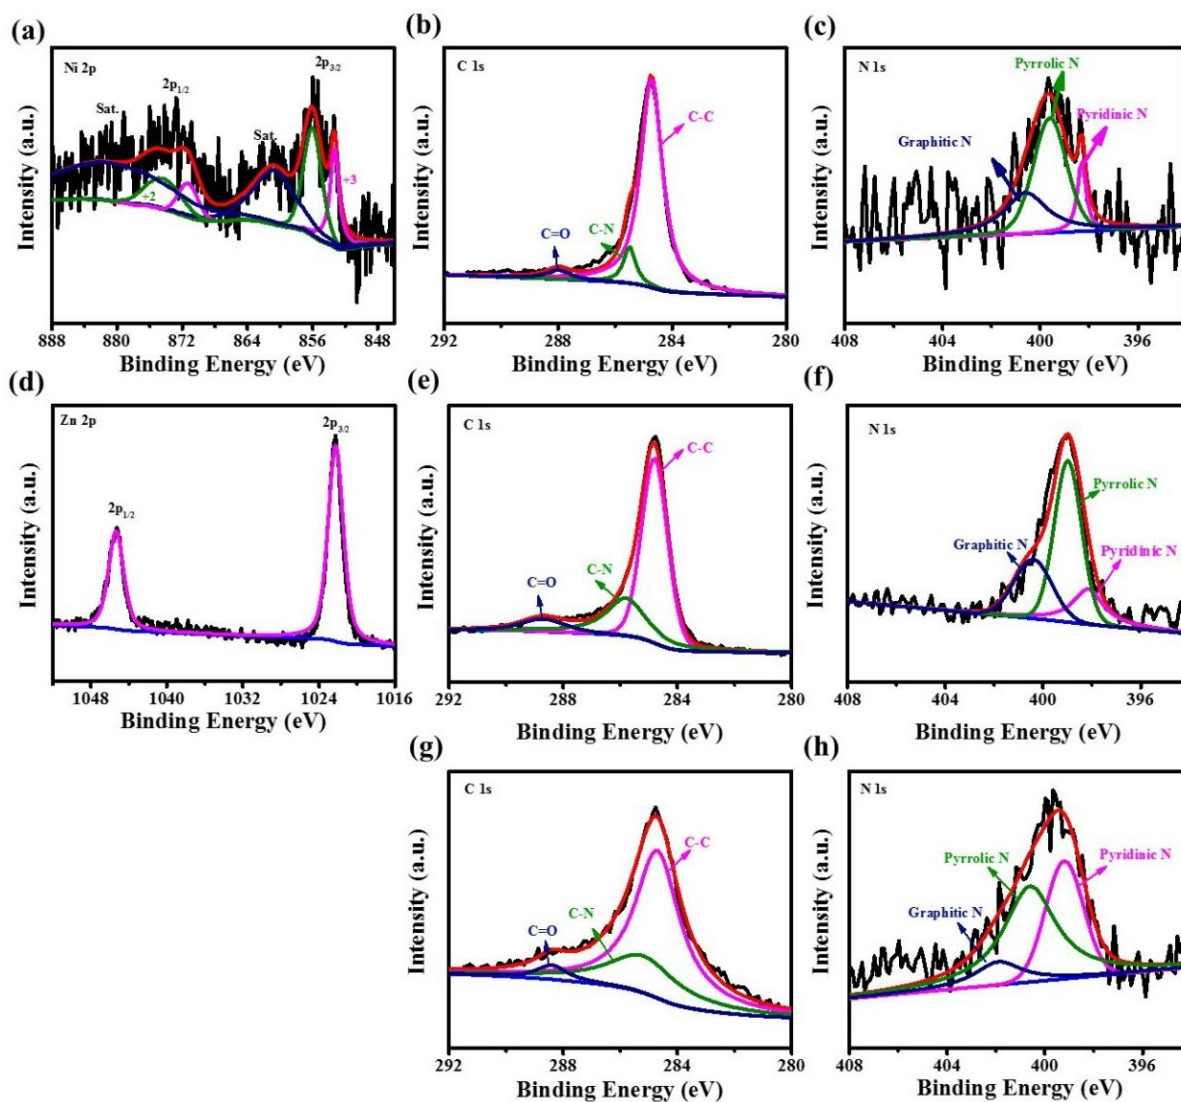

**Figure S2.** (a) Ni 2p, (b) C 1s, and (c) N 1s XPS spectra of Se@(NiCo)Se<sub>2</sub>. (d) Zn 2p, (e) C 1s, and (f) N 1s XPS spectra of Se@(ZnCo)Se<sub>2</sub>. (g) C 1s, and (h) N 1s XPS spectra of Se@CoSe<sub>2</sub>.

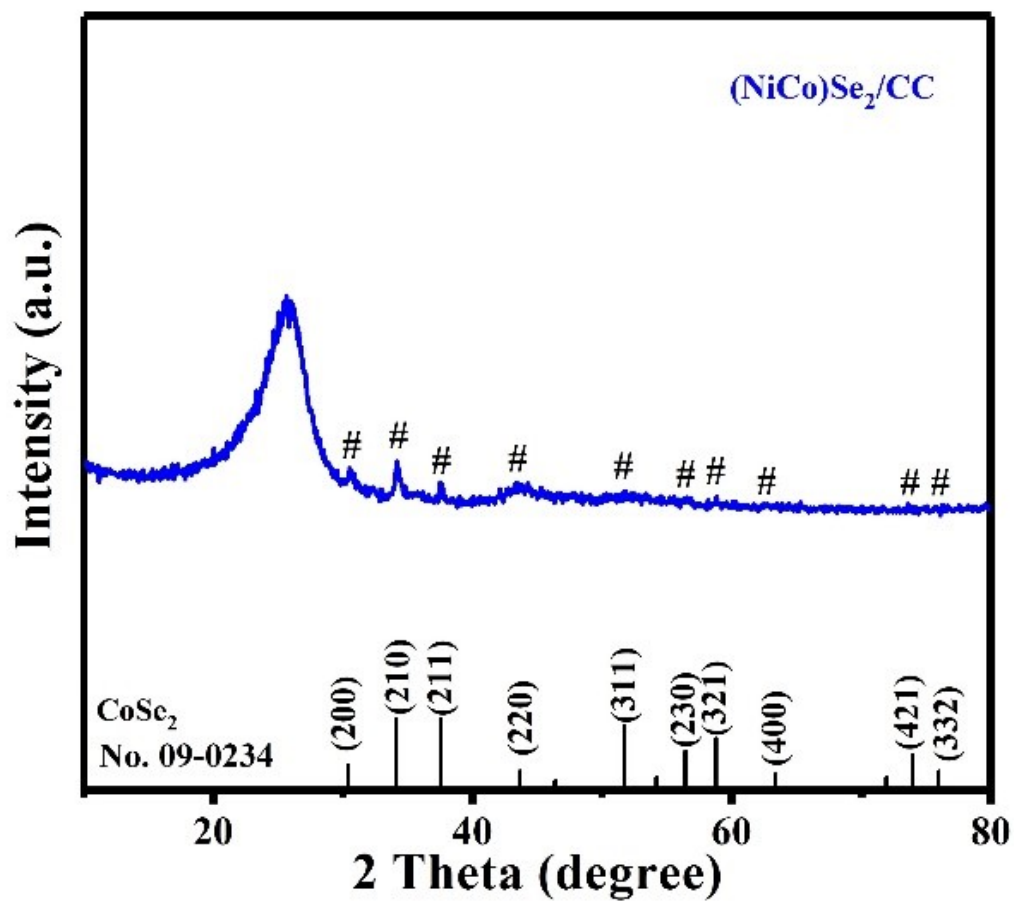

Figure S3. XRD pattern of the post-processed  $(\text{NiCo})\text{Se}_2/\text{CC}$  sample.

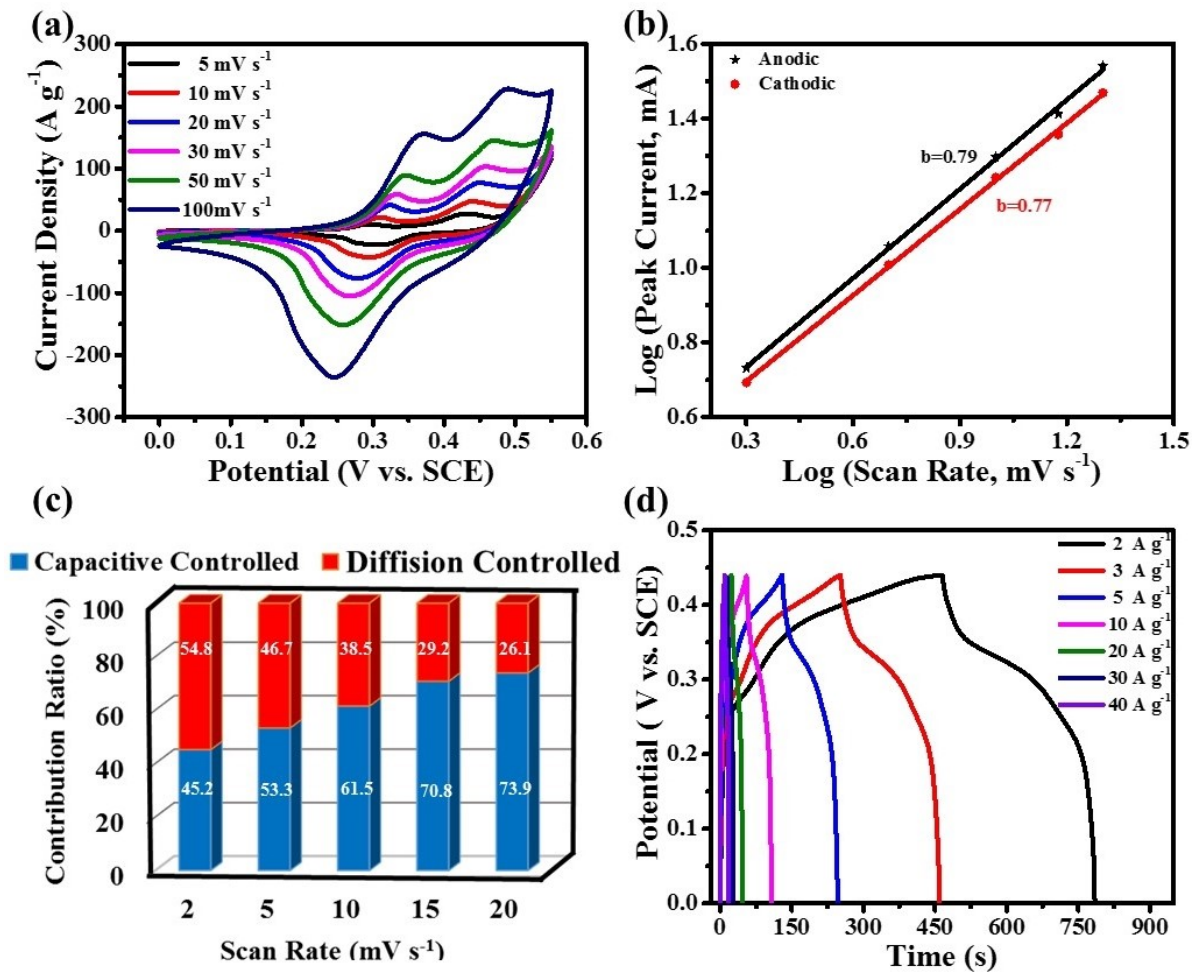

**Figure S4.** (a) CV curves, (b) Log (Peak Current) vs. log (Scan Rate) plots of  $\text{Se}@\text{(NiCo)Se}_2/\text{CC}$ , (c) Illustration of the possible capacity contribution ratios at different scan rates, and (d) GCD curves of the  $\text{Se}@\text{(NiCo)Se}_2/\text{CC}$  electrode.

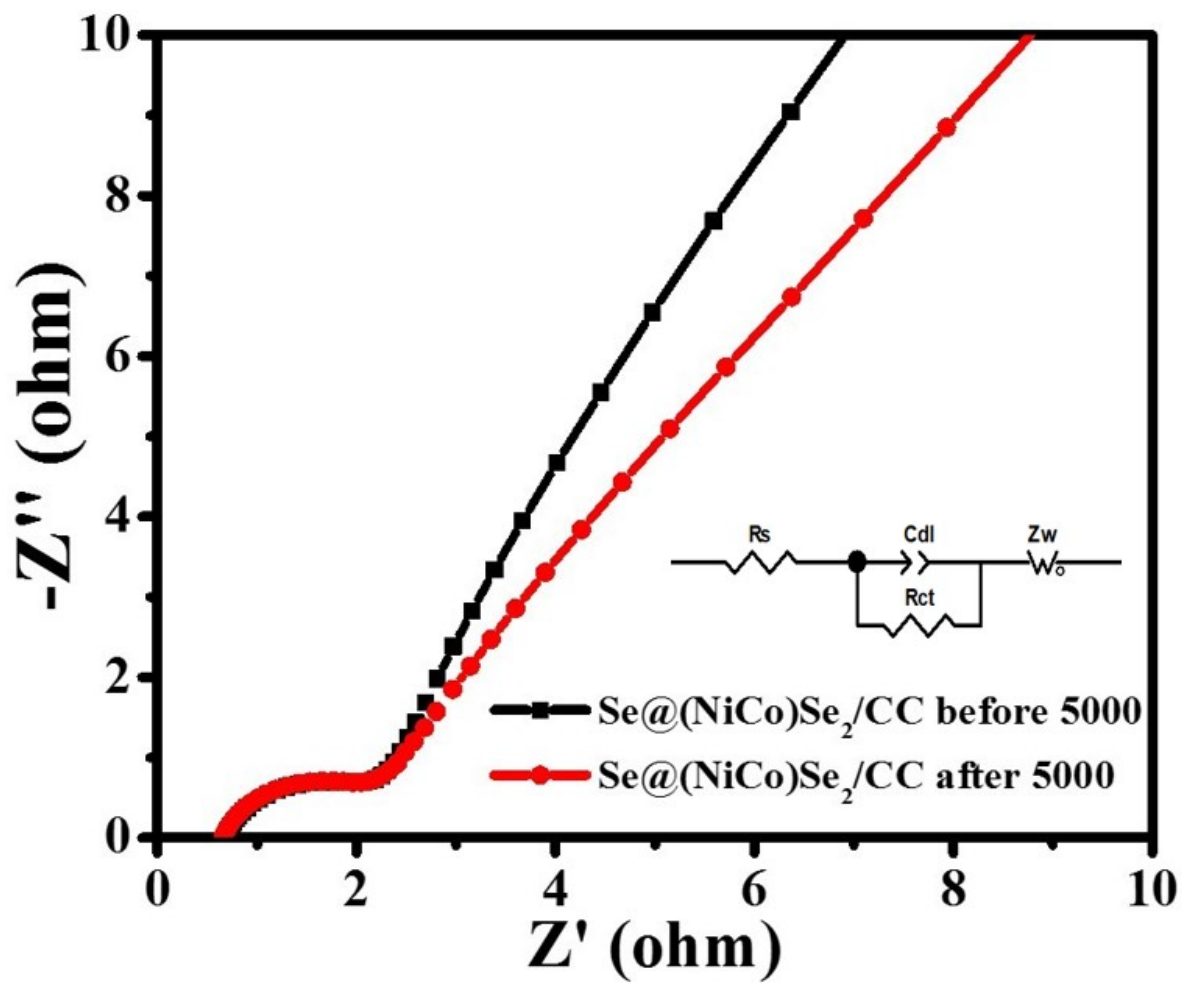

**Figure S5.** EIS curves of the Se@(NiCo)Se<sub>2</sub>/CC electrode before and after cycling at a current density of 20 A g<sup>-1</sup> recorded at open-circuit potentials.

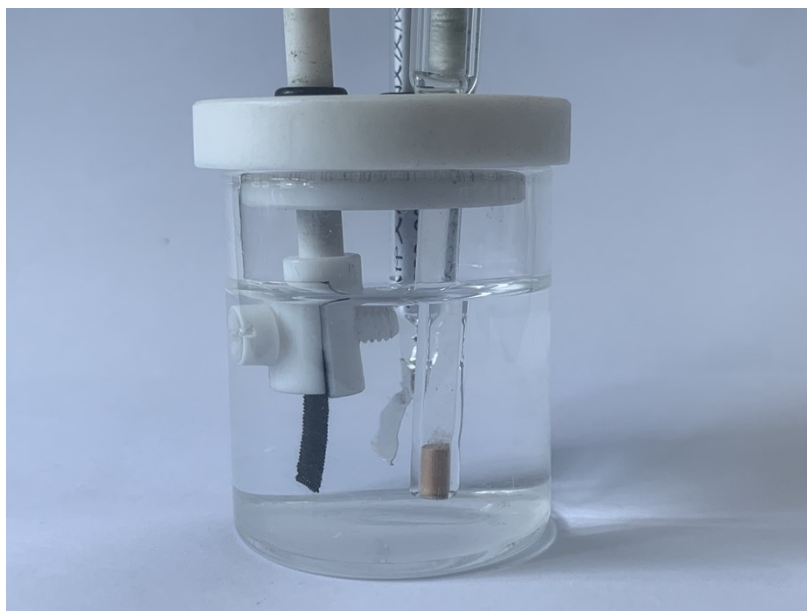

**Figure S6.** Photograph of the closed reaction equipment in a three-electrode system.

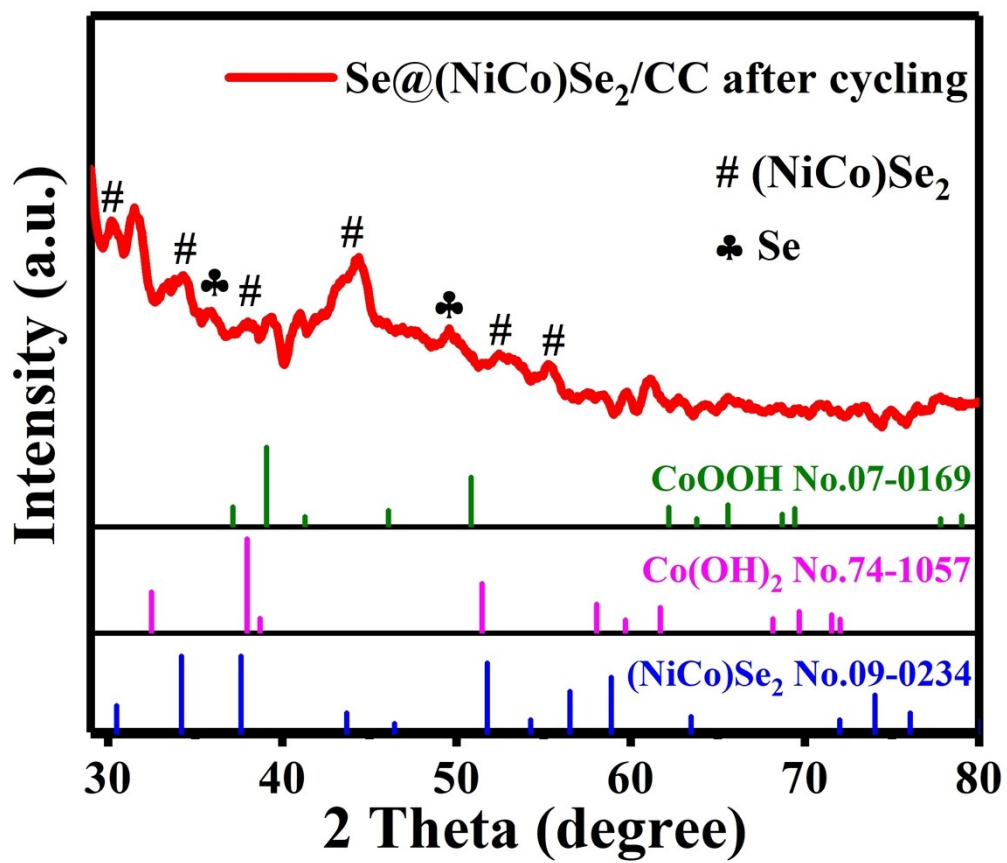

Figure S7. XRD pattern of the  $\text{Se}@\text{(NiCo)Se}_2$  electrode after cycling test.



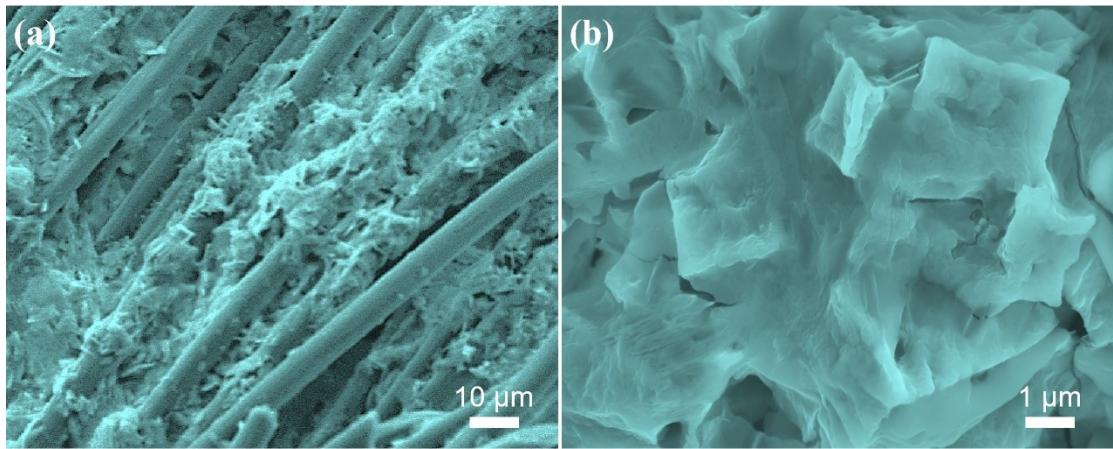

**Figure S8.** SEM images of the Se@(NiCo)Se<sub>2</sub>/CC electrode after cycling test.

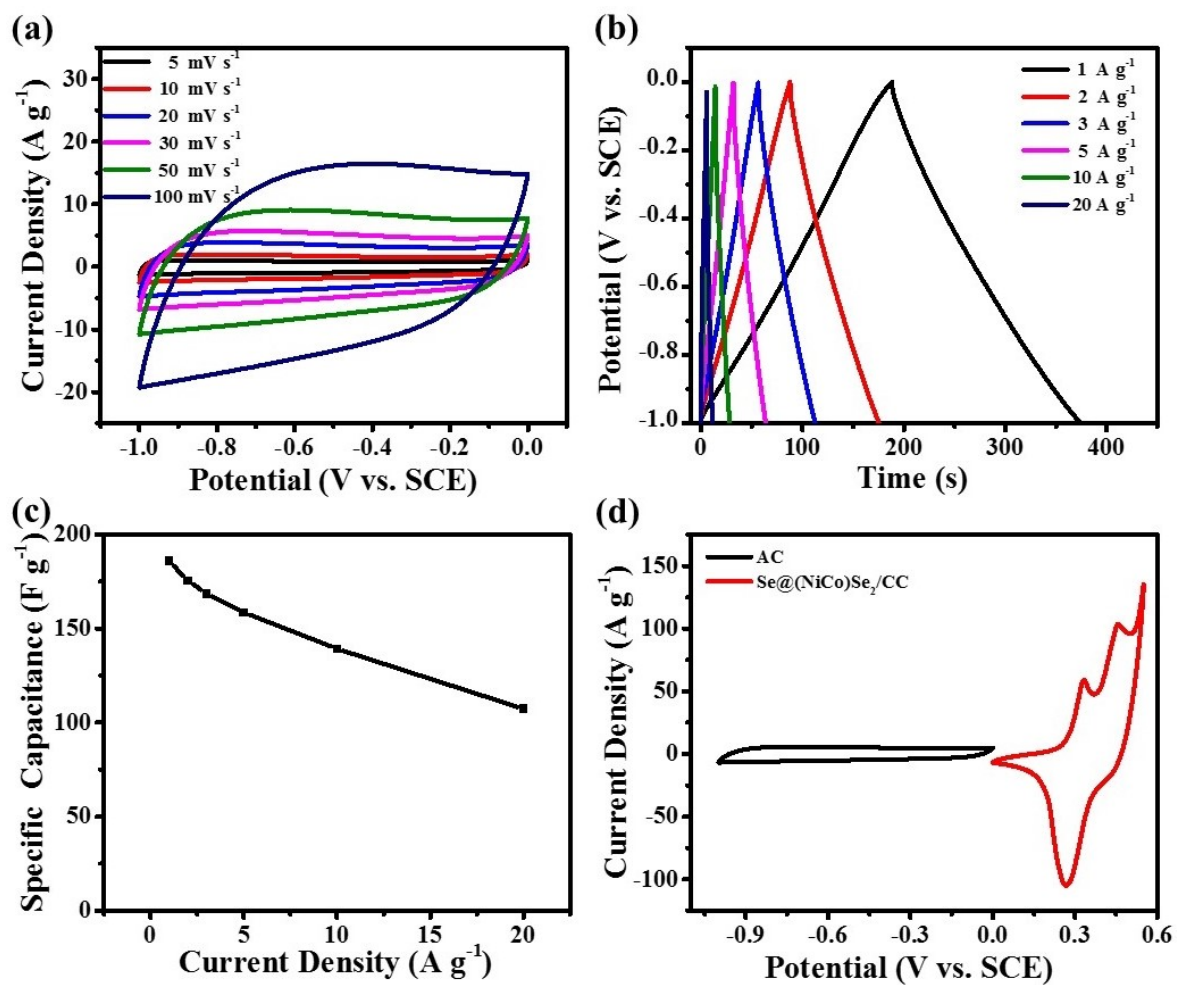

**Figure S9.** (a) CV, (b)GCD, and (c) Specific capacitance of AC electrode. (d) CV curves (scan rate of 30  $\text{mV s}^{-1}$ ) of AC and  $\text{Se}@\text{(NiCo)Se}_2/\text{CC}$  electrodes.

**Table S1.** The comparison of the specific capacitance, potential windows, electrolyte, and rate capability of the Se@(NiCo)Se<sub>2</sub> electrode and the related work in literature.

| Electrode materials                                 | $C_s$ (F g <sup>-1</sup> )                 | Potential windows (V) | Electrolyte   | Rate capability                               | Ref.             |
|-----------------------------------------------------|--------------------------------------------|-----------------------|---------------|-----------------------------------------------|------------------|
| CoSe <sub>2</sub> /rGO                              | 219<br>(0.5 A g <sup>-1</sup> )            | -0.2-0.45             | 3M KOH        | 0.5-10 A g <sup>-1</sup><br>73 %              | 42               |
| CoSe <sub>2</sub> /NC                               | 1236.34<br>(1 A g <sup>-1</sup> )          | 0-0.35                | 6 M KOH       | 1-20 A g <sup>-1</sup><br>61.2 %              | 43               |
| Porous CoSe <sub>2</sub> /NF                        | 713.2<br>(1 mA cm <sup>-2</sup> )          | -0.1-0.4              | 3 M KOH       | 1-20 mA<br>cm <sup>-2</sup><br>75.1 %         | 44               |
| 2D CoSNC                                            | 360.1<br>(1.5 A g <sup>-1</sup> )          | 0-0.6                 | 2 M KOH       | 1-30 A g <sup>-1</sup><br>56.8 %              | 17               |
| Cu-TCPP@PPy                                         | 500<br>(1 A g <sup>-1</sup> )              | -0.2-0.7              | 2 M KOH       | 1-10 A g <sup>-1</sup><br>57 %                | 45               |
| Co-TCPP<br>Nanosheet/GO                             | 510<br>(5 A g <sup>-1</sup> )              | -0.1-0.4              | 6 M KOH       | 5-20 A g <sup>-1</sup><br>74.5 %              | 16               |
| H-NiCoSe <sub>2</sub> sub-<br>microspheres          | 750<br>(3 A g <sup>-1</sup> )              | -0.2-0.4              | 6 M KOH       | 44.0 %<br>3-30 A g <sup>-1</sup>              | 46               |
| Ni <sub>0.6</sub> Co <sub>0.4</sub> Se <sub>2</sub> | 1339.1<br>(1 A g <sup>-1</sup> )           | 0-0.45                | 6 M KOH       | 1-20 A g <sup>-1</sup><br>77.7 %              | 9                |
| <b>Se@(NiCo)Se<sub>2</sub>/CC</b>                   | <b>1920</b><br><b>(2 A g<sup>-1</sup>)</b> | <b>0-0.45</b>         | <b>3M KOH</b> | <b>2-40 A g<sup>-1</sup></b><br><b>55.5 %</b> | <b>This work</b> |

rGO: reduced graphene oxide, NC: N-doped carbon, NF: nickel foam, CoSNC: CoS<sub>1.097</sub> nanoparticles and nitrogen-doped carbon, PPy: polypyrrole, GO: graphene oxide, H: Hollow, CC: carbon cloth

**Table S2.** Comparison of energy and power densities of our Se@(NiCo)Se<sub>2</sub>//AC asymmetric supercapacitor with the related work in literature.

| <b>Hybrid supercapacitors</b>                              | <b>Energy density<br/>Wh kg<sup>-1</sup></b> | <b>Power density<br/>W kg<sup>-1</sup></b> | <b>Reference</b> |
|------------------------------------------------------------|----------------------------------------------|--------------------------------------------|------------------|
| Ni <sub>0.6</sub> Co <sub>0.4</sub> Se <sub>2</sub> //BNPC | 14.5                                         | 16300                                      | 9                |
| CoSe <sub>2</sub> /NC-NF//AC                               | 40.9                                         | 980                                        | 43               |
| H-NiCoSe <sub>2</sub> //AC                                 | 25.5                                         | 3750                                       | 46               |
| NiCo-MOF//AC                                               | 20.9                                         | 800                                        | 60               |
| Ni-MOF//AC                                                 | 31.5                                         | 800                                        | 61               |
| CoSe <sub>2</sub> nanoarrays//carboon<br>nanowall          | 32.2                                         | 1914.7                                     | 62               |
| <b>Se@(NiCo)Se<sub>2</sub>//AC</b>                         | <b>49.4</b>                                  | <b>787.3</b>                               | <b>This work</b> |

AC: activated carbon, BNPC: boron and nitrogen co-doped porous carbon foam, NC: N-doped carbon, NF: nickel foam.
